# Supplementary material for: CeO2decorated on Co-ZIF-L-derived nickel–cobalt sulfide hollow nanosheet arrays for high-performance supercapacitors
Source: Royal Society of Chemistry journal article supplement (doi:10.1039/d2dt02300h), 2022-01-01
Supplement: d2dt02300h1.pdf [file d2dt02300h1.pdf]

## **Electronic Supplementary Information**

### **Characterization**

The crystalline structure of the sample was characterized by using X-ray diffractometer (Bruker AXS D8 Advance). The compositions and microstructures of the samples was further analyzed by field emission scanning electron microscopy (FESEM, Hitachi S-4800) and transmission electron microscopy (TEM, FEI Talos F200x) equipped with an energy dispersive X-ray spectrometer (EDS). X-ray photoelectron spectroscopy (XPS) measurements were performed using a Thermo Scientific K-Alpha spectrometer. Fourier transform infrared (FTIR) spectra were measured using a NICOLET-5700 FTIR spectrophotometer.

### **Electrochemical measurements**

Galvanostatic charge-discharge (GCD), cyclic voltammetry (CV) and electrochemical impedance spectroscopy (EIS) measurements were measured on a CHI660E electrochemical workstation (Shanghai chenhua). All experiments were performed at ambient temperature.

Three-electrode experiments were performed in an aqueous solution containing 2 M KOH. NiCoS/CeO<sub>2</sub>/NF (1×1 cm<sup>2</sup>), a saturated calomel electrode (SCE) and a platinum foil electrode were used as working electrodes, reference electrode and counter electrode, respectively.

For the two-electrode test, the ASC was constructed with a working

electrode (NiCoS/CeO<sub>2</sub>/NF) and an activated carbon (AC) electrode. Activated carbon electrodes were made by mixing the active material, conductive agent (acetylene black), and polyvinylidene fluoride (PVDF) in a mass ratio of 8:1:1, then adding a few drops of 1-methyl-2-pyrrolidone (NMP) to form a slurry, which was coated on the surface of a foamed nickel substrate (1 × 3 cm<sup>2</sup>), dried and pressed finally.

The specific capacitance ( $C_s$ , F/g) of the electrode materials is calculated as follows:

$$C_s = \frac{I \times \Delta t}{m \times \Delta V} \quad (S1)$$

where  $I$  (A),  $\Delta V$  (V),  $\Delta t$  (s) and  $m$  (g) represent the current, voltage window, discharge time and mass of active materials, respectively.

To assemble the ASC device, the amounts of charge ( $Q$ ) carried by the anode and cathode should be balanced by the following equation:

$$Q_- = m_- \times C_- \times \Delta V_- = m_+ \times C_+ \times \Delta V_+ = Q_+ \quad (S2)$$

where  $C$  (F/g),  $\Delta V$  (V) and  $m$  (g) are the specific capacitance, potential window and mass of active materials, respectively.

The energy density ( $E$ , Wh/kg) and power density ( $P$ , W/kg) of the V<sub>2</sub>O<sub>5</sub>@Co<sub>3</sub>S<sub>4</sub>-5h//AC cell is calculated as follows:

$$E = \frac{C_s \times (\Delta V)^2}{2 \times 3.6} \quad (S3)$$

$$P = \frac{3600 \times E}{\Delta t} \quad (S4)$$

where  $C_s$  (F/g),  $\Delta V$  (V) and  $t$  (s) are the specific capacitance, voltage window and

discharging time, respectively.

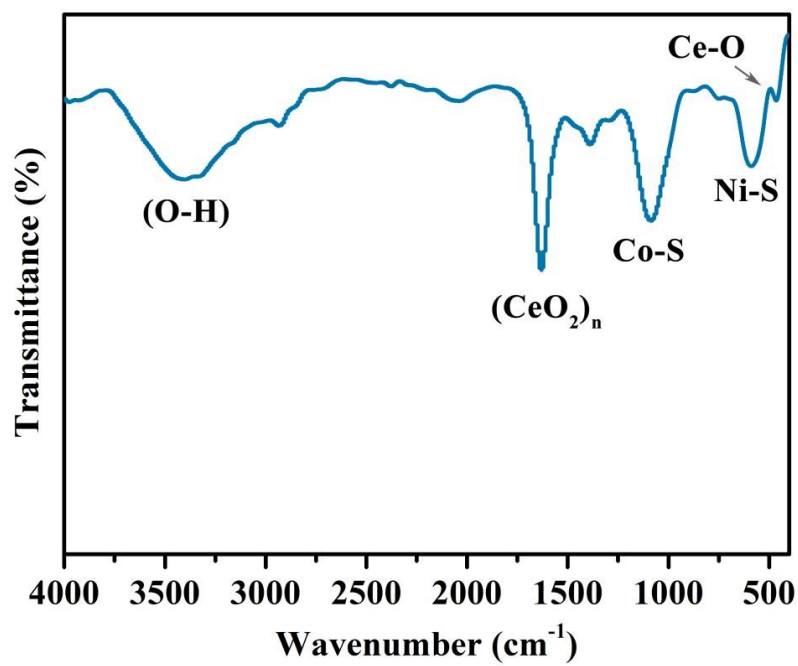

**Fig. S1.** FTIR spectrum of NiCoS/CeO<sub>2</sub>.

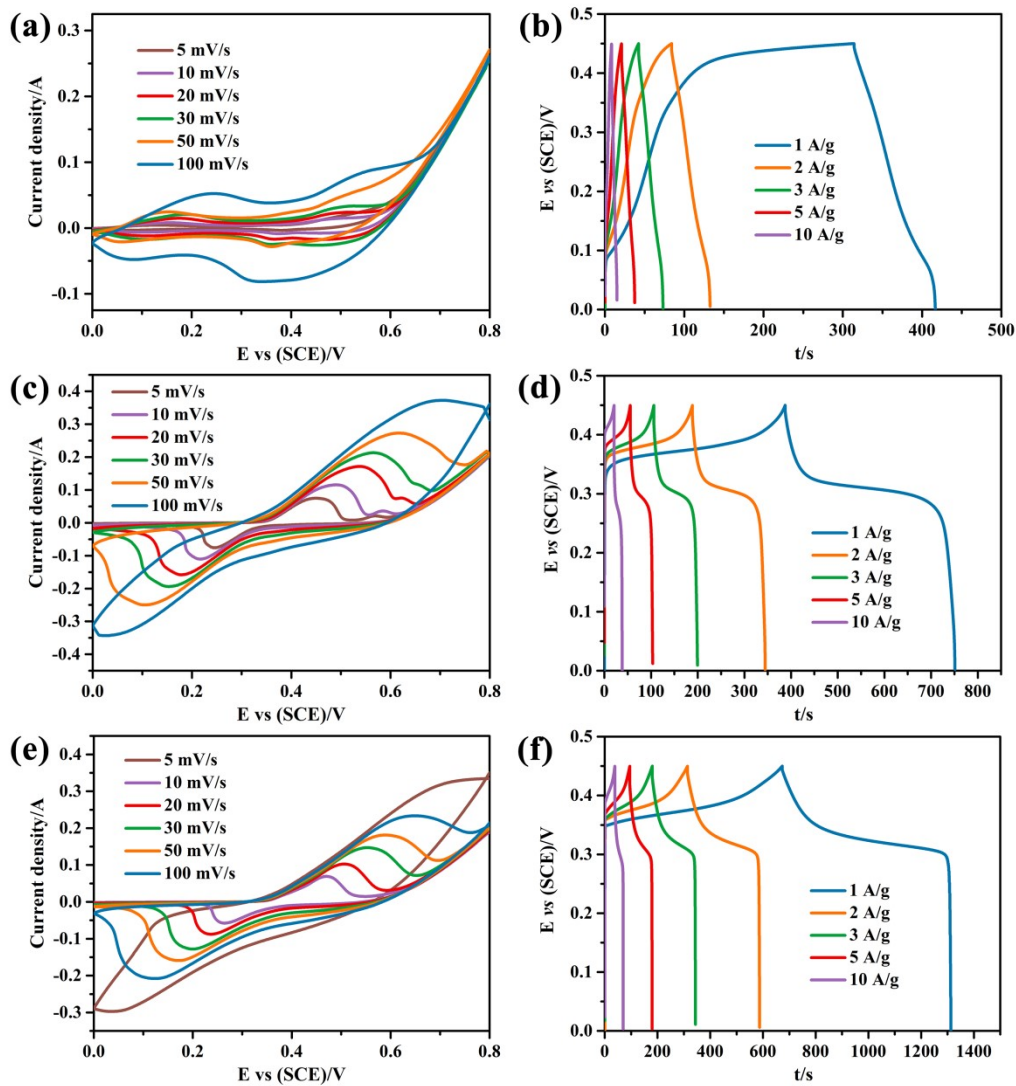

**Fig. S2.** (a, c, e) CV and (b, d, f) GCD curves of the (a, b) ZIF-L, (c, d) NiCo-LDH and (e, f) NiCoS.

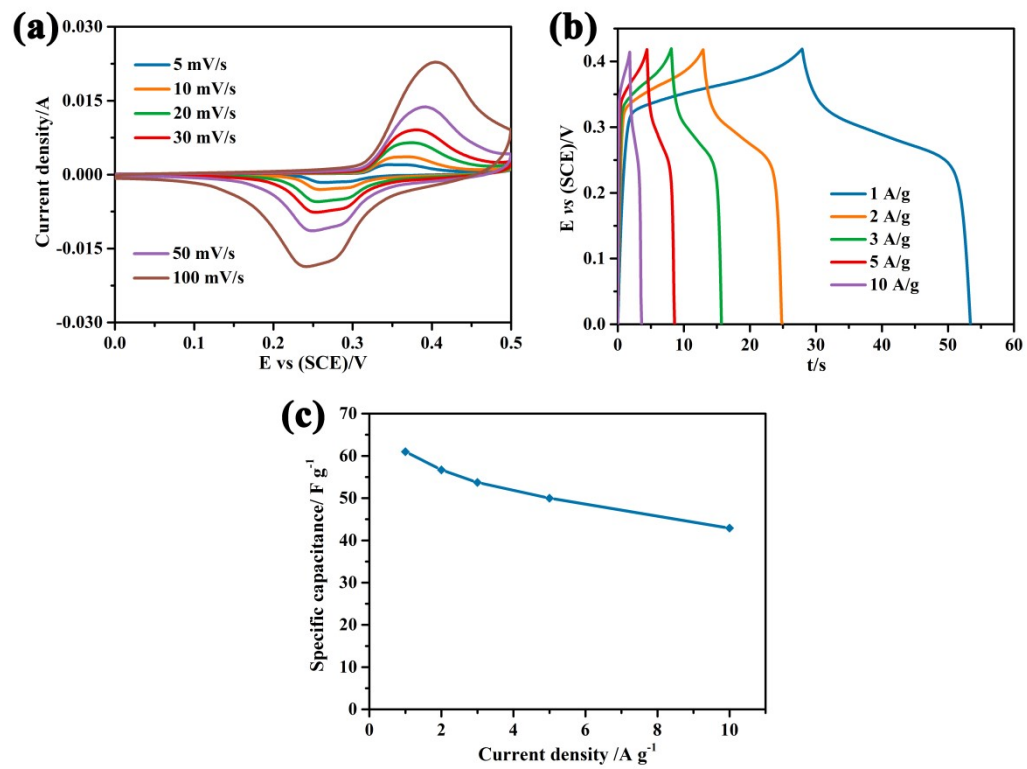

**Fig. S3.** (a) CV curves, (b) GCD curves and (c) specific capacitances of the  $CeO_2$ .

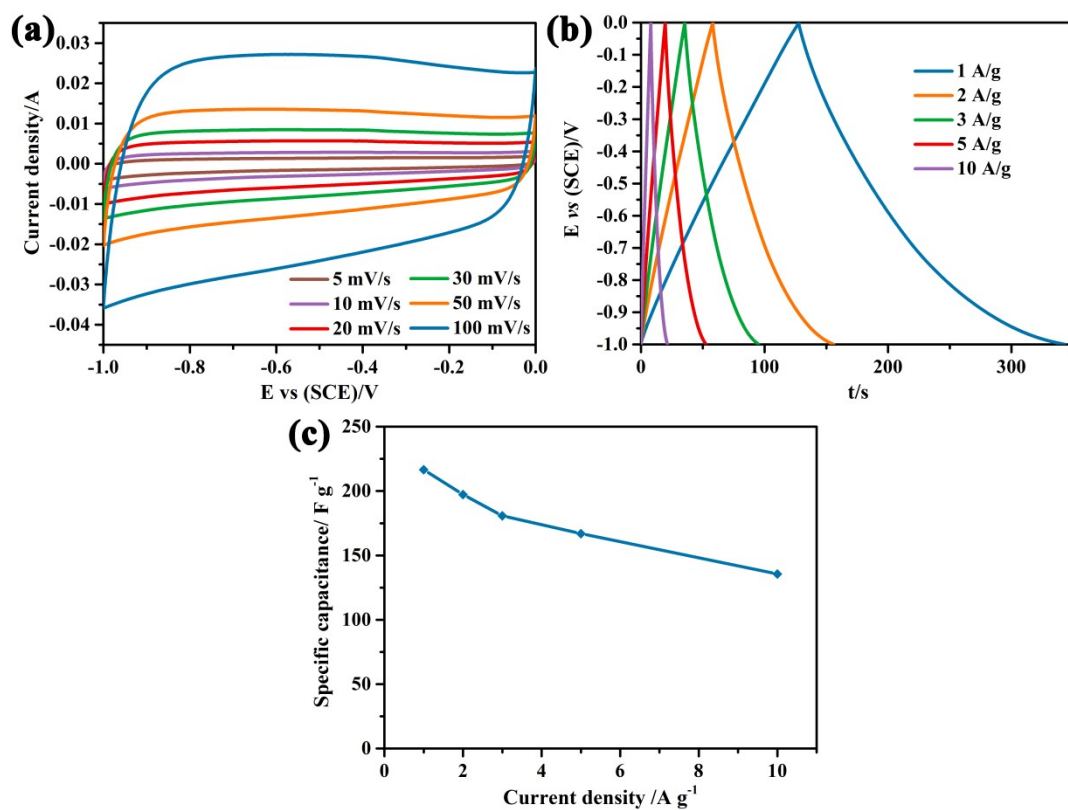

**Fig. S4.** (a) CV curves, (b) GCD curves and (c) specific capacitances of the AC electrode.

**Table S1.** Comparison of NiCoS/CeO<sub>2</sub> with previously reported electrode materials

| electrode materials                                    | current density      | specific capacitance                                 | reference        |
|--------------------------------------------------------|----------------------|------------------------------------------------------|------------------|
| NiCoS/CeO <sub>2</sub>                                 | 1 A g <sup>-1</sup>  | 2840.2 F g <sup>-1</sup> (1278.1 C g <sup>-1</sup> ) | <b>this work</b> |
|                                                        | 10 A g <sup>-1</sup> | 1582.3 F g <sup>-1</sup> (712 C g <sup>-1</sup> )    |                  |
| CeO <sub>2</sub> @(Ni, Co) <sub>3</sub> S <sub>4</sub> | 1 A g <sup>-1</sup>  | 1319 F g <sup>-1</sup>                               | 1                |
| Co <sub>3</sub> S <sub>4</sub> /CeO <sub>2</sub> -NPAs | 1 A g <sup>-1</sup>  | 2310 F g <sup>-1</sup> (1108.8 C g <sup>-1</sup> )   | 2                |
| NiCoS@PPy                                              | 1 A g <sup>-1</sup>  | 2316.7 F g <sup>-1</sup>                             | 3                |
| ZnO/CoO@NiCoS nanoarrays                               | 1 A g <sup>-1</sup>  | 934 C g <sup>-1</sup>                                | 4                |
| CeO <sub>2</sub> /Ni-Al LDH                            | 1 A g <sup>-1</sup>  | 879.6 F g <sup>-1</sup>                              | 5                |
| PANI/CeO <sub>2</sub> /Ni(OH) <sub>2</sub>             | 1 A g <sup>-1</sup>  | 2556 F g <sup>-1</sup>                               | 6                |
| NiCo <sub>2</sub> O <sub>4</sub> /CeO <sub>2</sub>     | 10 A g <sup>-1</sup> | 1312.3 F g <sup>-1</sup>                             | 7                |
| rGO-Ni-Mo-oxide@Ni-Co-S<br>core-shell nanotubes        | 1 A g <sup>-1</sup>  | 2867 F g <sup>-1</sup>                               | 8                |
| CeO <sub>2</sub> @NiFeLDH                              | 1 A g <sup>-1</sup>  | 516.5 F g <sup>-1</sup>                              | 9                |
| NiCoS/d-Ti <sub>3</sub> C <sub>2</sub>                 | 1 A g <sup>-1</sup>  | 758.9 C g <sup>-1</sup>                              | 10               |
| CoMoS <sub>4</sub> @Ni-Co-S nanotubes                  | 1 A g <sup>-1</sup>  | 2208.5 F g <sup>-1</sup>                             | 11               |



**Table S2.** EIS fitting results of the samples

|                     | ZIF-L  | NiCo-LDH | NiCoS  | NiCoS /CeO <sub>2</sub> |
|---------------------|--------|----------|--------|-------------------------|
| R <sub>s</sub> (Ω)  | 0.8546 | 0.8223   | 0.6824 | 0.6228                  |
| R <sub>ct</sub> (Ω) | 0.5196 | 0.4167   | 0.4976 | 0.3338                  |

## References

1. Z. Xue, C. Yang, K. Tao and L. Han, Heterostructure of metal–organic framework-derived straw-bundle-like CeO<sub>2</sub> decorated with (Ni, Co)<sub>3</sub>S<sub>4</sub> nanosheets for high-performance supercapacitor, *Applied Surface Science*, 2022, **592**, 153231.
2. Z. Xue, L. Lv, Y. Tian, S. Tan, Q. Ma, K. Tao and L. Han, Co<sub>3</sub>S<sub>4</sub> Nanoplate Arrays Decorated with Oxygen-Deficient CeO<sub>2</sub> Nanoparticles for Supercapacitor Applications, *ACS Applied Nano Materials*, 2021, **4**, 3033-3043.
3. X. Zhao, Q. Ma, K. Tao and L. Han, ZIF-Derived Porous CoNi<sub>2</sub>S<sub>4</sub> on Intercrosslinked Polypyrrole Tubes for High-Performance Asymmetric Supercapacitors, *ACS Applied Energy Materials*, 2021, **4**, 4199-4207.
4. Y. He, X. Zhou, S. Ding, Q. Hu, D. Lin and X. Wei, ZnO/CoO@NiCoS nanohybrids with double heterogeneous interface for high-performance hybrid supercapacitors, *Journal of Alloys and Compounds*, 2021, **875**, 160046.
5. J. Zheng, J. Wang, J. Qu, M. Wu and Z. Xu, CeO<sub>2</sub>/Ni-Al layered double hydroxide composite electrode for the enhancement of specific capacitance and capacitance retention performance, *Applied Clay Science*, 2022, **216**, 106370.
6. Q. Guo, J. Yuan, Y. Tang, C. Song and D. Wang, Self-assembled PANI/CeO<sub>2</sub>/Ni(OH)<sub>2</sub> hierarchical hybrid spheres with improved energy storage capacity for high-performance supercapacitors, *Electrochimica Acta*, 2021, **367**, 137525.
7. G. Santhosh, G. P. Nayaka and A. S. Bhatt, Ultrahigh capacitance of NiCo<sub>2</sub>O<sub>4</sub>/CeO<sub>2</sub> mixed metal oxide material for supercapacitor applications, *Journal of Alloys and Compounds*, 2022, **899**, 163312.
8. J. Acharya, G. P. Ojha, B. S. Kim, B. Pant and M. Park, Modish Designation of Hollow-Tubular rGO-NiMoO<sub>4</sub>@Ni-Co-S Hybrid Core-shell Electrodes with Multichannel Superconductive Pathways for High-Performance Asymmetric Supercapacitors, *ACS Appl Mater Interfaces*, 2021, **13**, 17487-17500.
9. T. Zhou, W. Zhang, H. Fu, J. Fang, C. Chen and Z. Wang, Preparation of 3D CeO<sub>2</sub>@NiFe-LDH composites derived from prussian blue analogues for high performance supercapacitors, *Materials Science in Semiconductor Processing*, 2022, **150**, 106913.
10. Y. Luo, Y. Tian, Y. Tang, X. Yin and W. Que, 2D hierarchical nickel cobalt sulfides coupled with ultrathin titanium carbide (MXene) nanosheets for hybrid supercapacitors, *Journal of Power Sources*, 2021, **482**, 228961.
11. F. Ma, X. Dai, J. Jin, N. Tie and Y. Dai, Hierarchical core-shell hollow CoMoS<sub>4</sub>@Ni–Co–S nanotubes hybrid arrays as advanced electrode material for supercapacitors, *Electrochimica Acta*, 2020, **331**, 135459.
